# Supplementary material for: Corrosion control of mild steel in 0.1 M H2SO4solution by benzimidazole and its derivatives: an experimental and theoretical study
Source: Royal Society of Chemistry journal article supplement (doi:10.1039/c7ra02192e), 2017-01-01
Supplement: c7ra02192e1.pdf [file c7ra02192e1.pdf]

### Supporting Information

**Table S1** The inhibitive efficiency ( $\eta$ ) comparison of our studied inhibitors with other benzimidazole derivatives that previously reported elsewhere.

| Inhibitor structure                                                                 | Medium                               | Concentration        | $\eta$ (%) | References |
|-------------------------------------------------------------------------------------|--------------------------------------|----------------------|------------|------------|
| 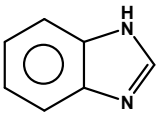   | 0.1 M H <sub>2</sub> SO <sub>4</sub> | 1×10 <sup>-3</sup> M | 34.3       | This work  |
|    | 0.1 M H <sub>2</sub> SO <sub>4</sub> | 1×10 <sup>-3</sup> M | 62.8       | This work  |
|    | 0.1 M H <sub>2</sub> SO <sub>4</sub> | 1×10 <sup>-3</sup> M | 88.5       | This work  |
|    | 0.1 M H <sub>2</sub> SO <sub>4</sub> | 1×10 <sup>-3</sup> M | 99.8       | This work  |
|   | 1.0 M HCl                            | 1×10 <sup>-4</sup> M | 95.0       | [1]        |
|  | 1.0 M HCl                            | 200 ppm              | 94.8       | [2]        |
|  | 2.0 M HCl                            | 100 mg/L             | 90.2       | [3]        |
|  | 2.0 M HCl                            | 100 mg/L             | 93.5       | [3]        |
|  | 0.5 M HCl                            | 200 ppm              | 80.1       | [4]        |
|  | 0.5 M HCl                            | 200 ppm              | 86.5       | [4]        |
|  | 1.0 M HCl                            | 1×10 <sup>-3</sup> M | 96.0       | [5]        |

| Inhibitor structure                                                               | Medium    | C                    | $\eta$ (%) | References |
|-----------------------------------------------------------------------------------|-----------|----------------------|------------|------------|
| 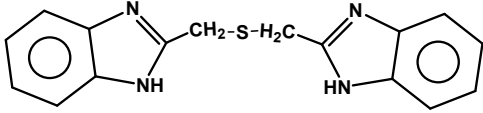 | 1.0 M HCl | $1 \times 10^{-3}$ M | 92.0       | [5]        |
|  | 1.0 M HCl | $1 \times 10^{-3}$ M | 91.0       | [5]        |
|  | 1.0 M HCl | $1 \times 10^{-3}$ M | 89.0       | [5]        |

## References

- [1] D. Q. Zhang, Y. M. Tang, S. J. Qi, D. W. Dong, H. Cang and G. Lu, *Corros. Sci.*, 2016, **102**, 517-522.
- [2] R. Mohan, K. Ramya, K. K. Anupama and A. Joseph, *J. Mol. Liq.*, 2016, **220**, 707-717.
- [3] N. Esmaili, J. Neshati and I. Yavari, *Res. Chem. Intermed.*, 2016, **42**, 5339-5351.
- [4] I. B. Obot, A. Madhankumar, S. A. Umoren and Z. M. Gasem, *J. Adhes. Sci. Technol.*, 2015, **29**, 2130-2152.
- [5] A. Dutta, S. K. Saha, P. Banerjee and D. Sukul, *Corros. Sci.*, 2015, **98**, 541-550.
